# Supplementary material
Source: Royal Society of Chemistry journal article supplement (doi:10.1039/d5fo05382j)
Supplement: d5fo05382j2.pdf [file d5fo05382j2.pdf]

1 **1.1 Supplementary material**

2

3 **Figure S1** Contour plots and chromatograms resulting from HPLC-DAD-ESI-TIMS-HR-  
4 MS/MS analysis of phenolic and other hydrophilic compounds detected in pasteurized  
5 pineapple juices applying the negative (a.) and positive (b.) ion mode. For compound  
6 assignment, see **Table 4**

7
