# Supplementary material
Source: Royal Society of Chemistry journal article supplement (doi:10.1039/d5fo05382j)

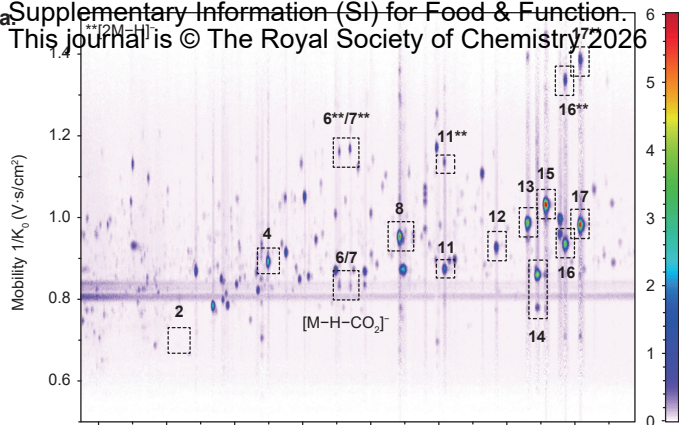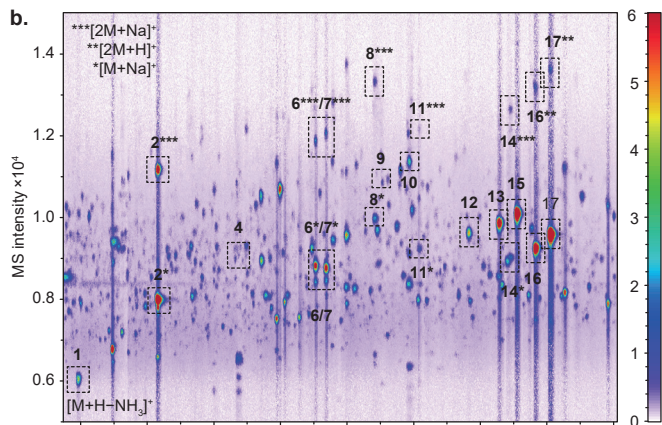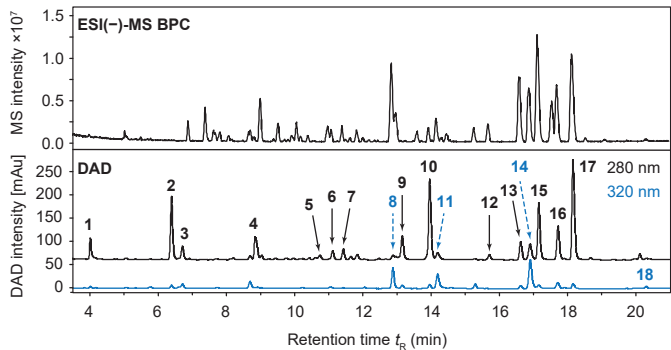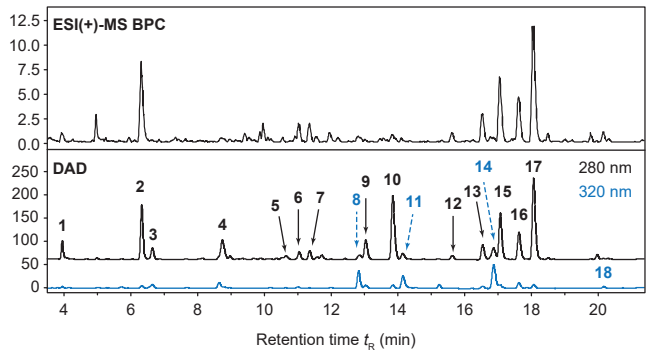

Supplement: d5fo05382j1.pdf [file d5fo05382j1.pdf]
